# Supplementary material
Source: PubMed Central journal article supplement (PMC7593849)
Supplement: NIHMS1639346-supplement-1.pdf [file NIHMS1639346-supplement-1.pdf]

## Supplementary information

## Carrier-free nano-assembly of curcumin-erlotinib conjugate for cancer targeted therapy

Chen Cheng, Binglin Sui, Mingming Wang, Xiangxiang Hu, Shanshan Shi, and Peisheng Xu\*

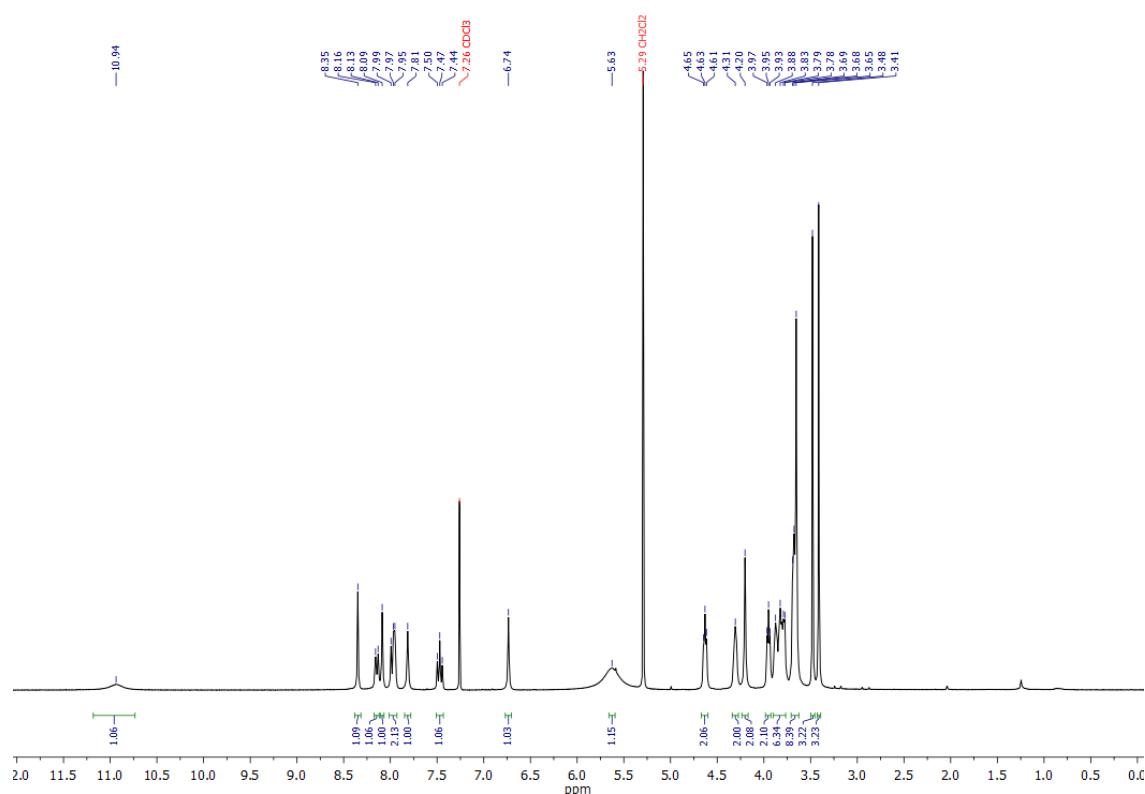**Figure S1.**  $^1\text{H}$  NMR spectrum of ELT-PEG.**ELT-PEG ( $\text{C}_{30}\text{H}_{38}\text{N}_6\text{O}_9$ )**

$^1\text{H}$  NMR (300 MHz,  $\text{CDCl}_3$ )  $\delta$  10.94 (s, 1H), 8.35 (s, 1H), 8.15 (d,  $J = 8.3$ , 1H), 8.09 (s, 1H), 8.01-7.93 (m, 2H), 7.81 (s, 1H), 7.47 (t,  $J = 7.9$ , 1H), 6.74 (s, 1H), 5.63 (s, 1H), 4.63 (t,  $J = 4.8$ , 2H), 4.31 (s, 2H), 4.20 (s, 2H), 3.95 (t,  $J = 4.8$ , 2H), 3.90-3.77 (m, 6H), 3.72-3.60 (m, 8H), 3.48 (s, 3H), 3.41 (s, 3H).

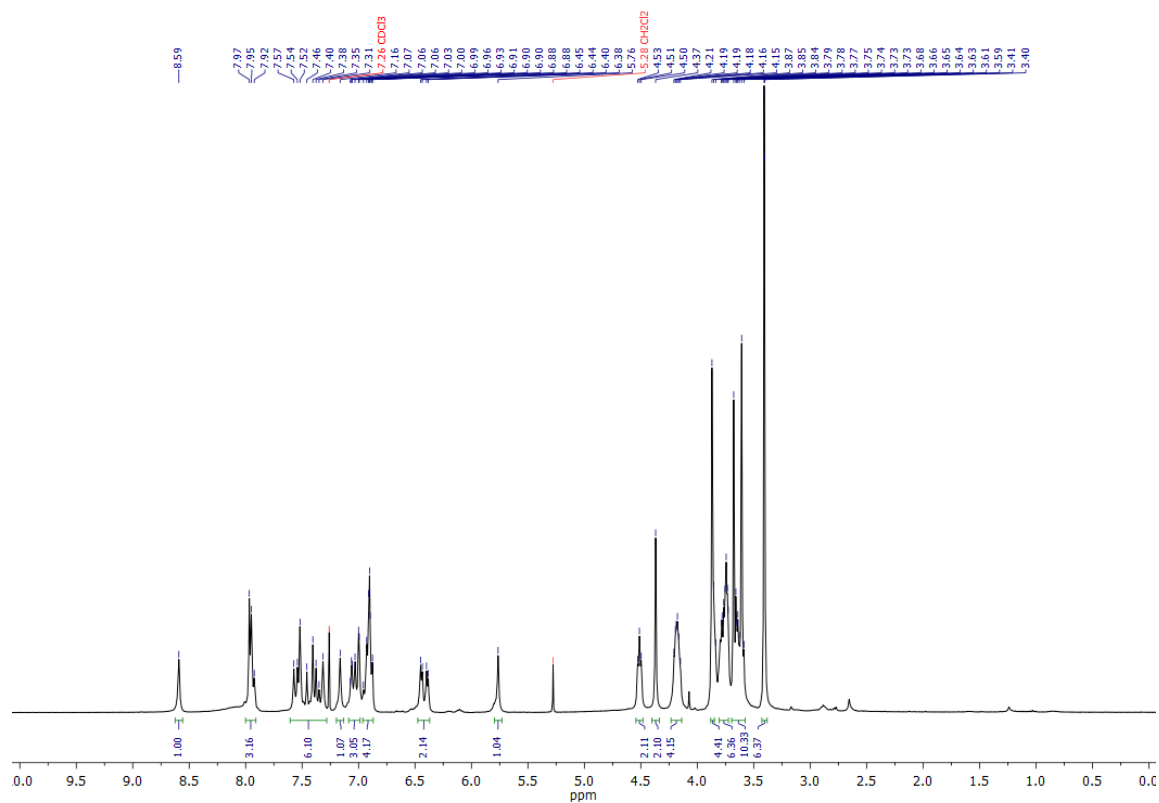

**Figure S2.**  $^1\text{H}$  NMR spectrum of EPC.

**EPC ( $\text{C}_{51}\text{H}_{56}\text{N}_6\text{O}_{14}$ )**

$^1\text{H}$  NMR (300 MHz,  $\text{CDCl}_3$ )  $\delta$  8.59 (s, 1H), 8.01-7.88 (m, 3H), 7.61-7.28 (m, 6H), 7.16 (s, 1H), 7.09-6.99 (m, 3H), 6.97-6.85 (m, 4H), 6.42 (dd,  $J = 15.7, 4.7$ , 2H), 4.51 (t,  $J = 4.8$ , 2H), 4.37 (s, 2H), 4.23-4.14 (m, 4H), 3.91-3.82 (m, 4H), 3.80-3.72 (m, 6H), 3.70-3.58 (m, 10H), 3.41 (d,  $J = 1.4$ , 6H).

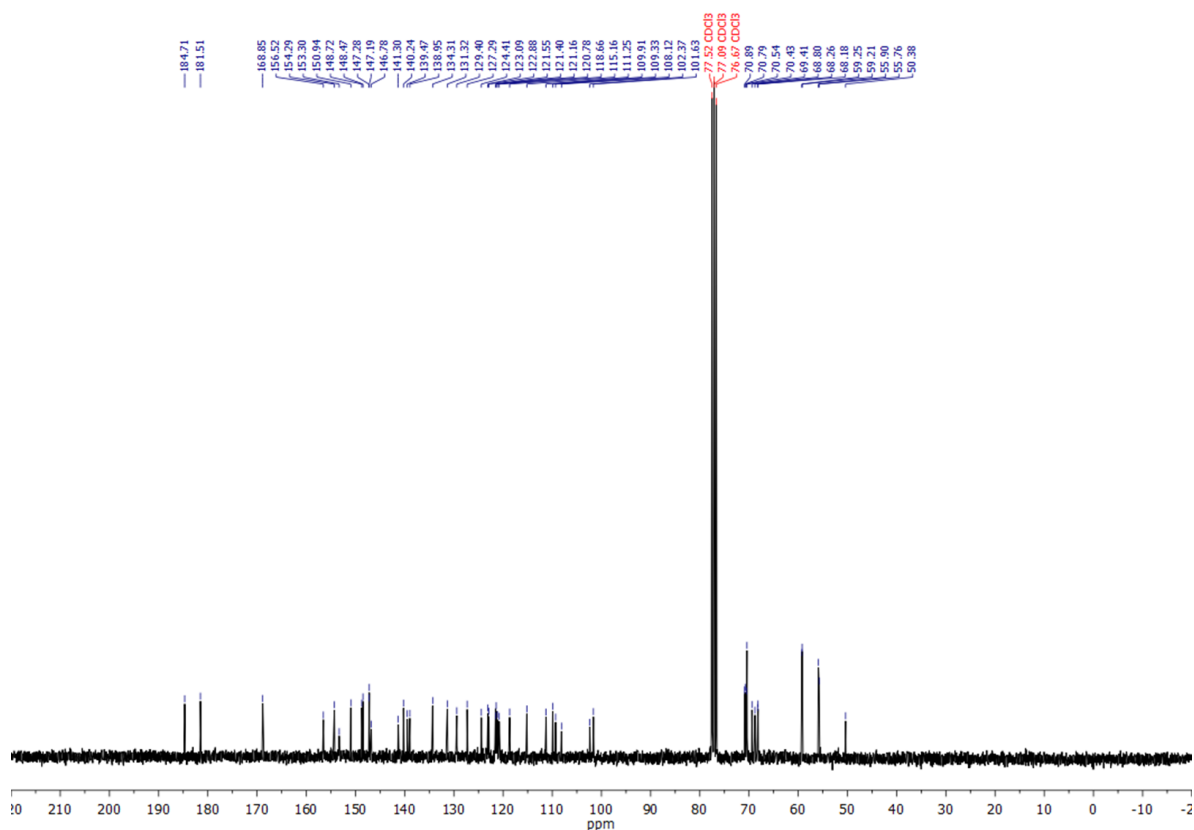

**Figure S3.**  $^{13}\text{C}$  NMR spectrum of EPC.

**EPC ( $\text{C}_{51}\text{H}_{56}\text{N}_6\text{O}_{14}$ )**

$^{13}\text{C}$  NMR (75 MHz)  $\delta$  184.71, 181.51, 168.85, 156.52, 154.29, 153.30, 150.94, 148.72, 148.47, 147.28, 147.19, 146.78, 141.30, 140.24, 139.47, 138.95, 134.31, 131.32, 129.40, 127.29, 124.41, 123.09, 122.88, 121.55, 121.40, 121.16, 120.78, 118.66, 115.16, 111.25, 109.91, 109.33, 108.12, 102.37, 101.63, 70.89, 70.79, 70.54, 70.43, 69.41, 68.80, 68.26, 68.18, 59.25, 59.21, 55.90, 55.76, 50.38.

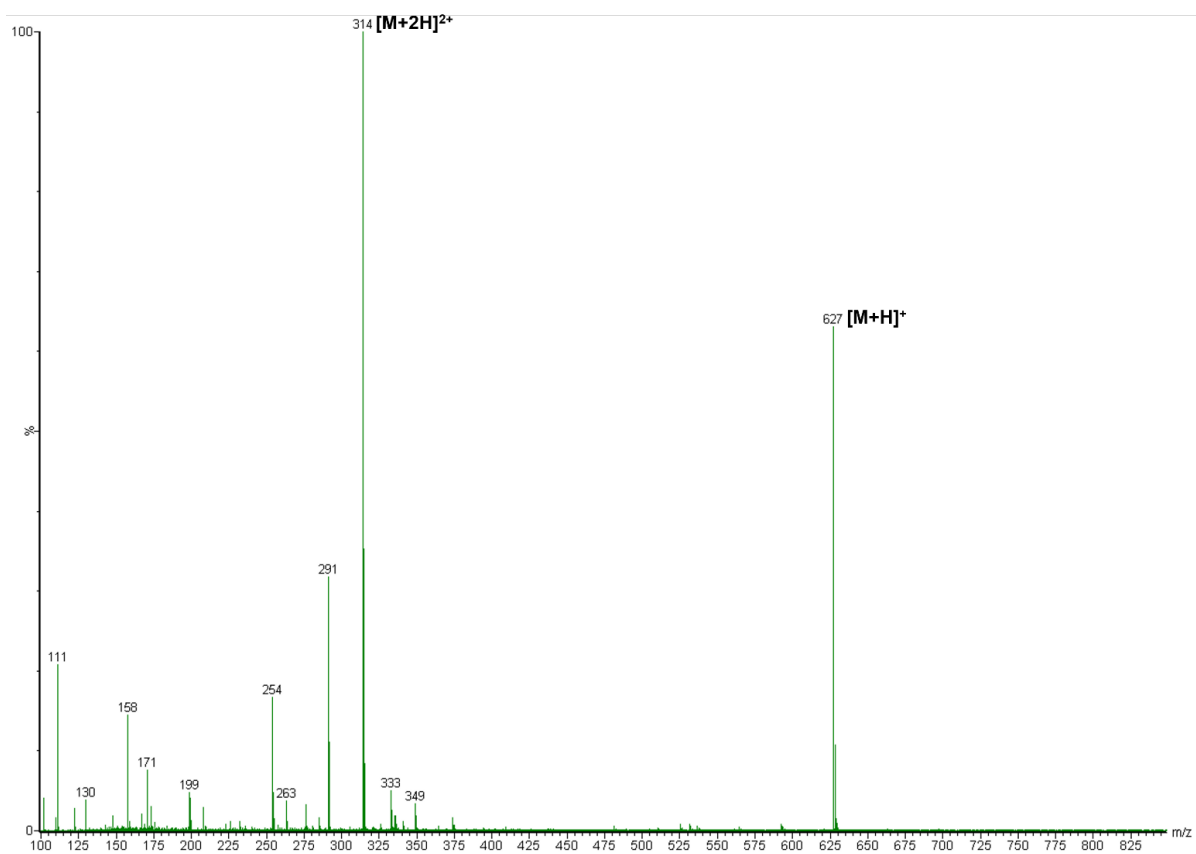

**Figure S4.** MS spectrum of ELT-PEG. HRMS: calculated  $[M+H]^+$  for  $C_{30}H_{38}N_6O_9$ : 627.2773, found: 627.2774.

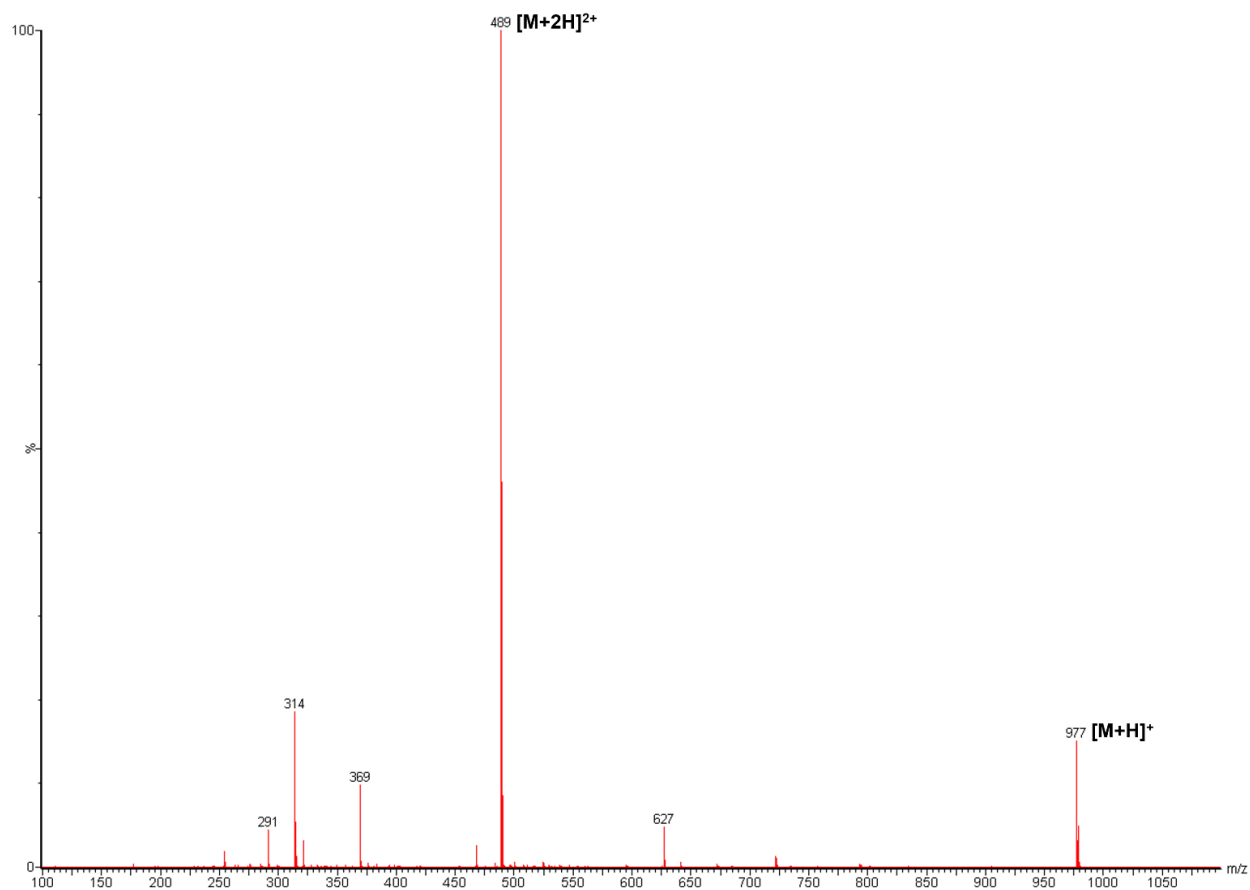

**Figure S5.** MS spectrum of EPC. HRMS: calculated  $[M+H]^+$  for  $C_{51}H_{56}N_6O_{14}$ : 977.3927, found: 977.3899.

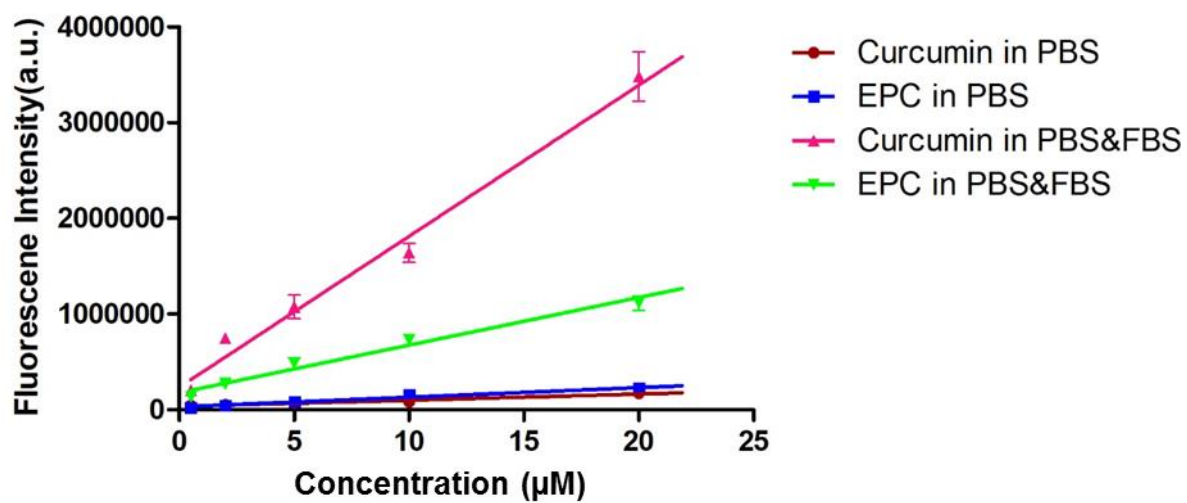

**Figure S6.** The fluorescence emission intensity of CCM and EPC in PBS supplemented with 10% FBS.  $\lambda_{\text{ex}} = 420 \text{ nm}$ .
